# Supplementary material for: Two new luminescent Cd(ii)-based coordination polymers by regulating the asymmetrical tetracarboxylate and auxiliary ligands displaying high sensitivity for Fe3+and CrO42−
Source: Royal Society of Chemistry journal article supplement (doi:10.1039/d1ce00310k), 2021-01-01
Supplement: d1ce00310k1.pdf [file d1ce00310k1.pdf]

## Supporting Information

### Two new luminescent Cd(II)-based coordination polymers by regulating the asymmetrical tetracarboxylate and auxiliary ligands displaying high sensitivity for Fe<sup>3+</sup> and CrO<sub>4</sub><sup>2-</sup>

#### Materials and Method

All the reagents to perform synthesis were obtained from commercial sources and were used without further purification. Powder X-ray diffraction (PXRD) data were collected using Bruker ADVANCE X-ray diffractometer with Cu-K $\alpha$  radiation ( $\lambda=1.5418$  Å) at 50 kV, 20 mA with a scanning rate of 6°/min and a step size of 0.02°. Fourier transform infrared (FT-IR) spectra for both the coordination polymers as KBr discs were recorded on Nicolet Impact 750 FTIR in the range of 400-4000 cm<sup>-1</sup>. Thermogravimetric analyses (TGA) were performed under nitrogen atmosphere from room temperature to 900 °C at a heating rate of 10 °C min<sup>-1</sup>. The sensor investigations were carried out on spectrophotometer.

#### X-ray Crystallography

The single crystal X-ray diffraction data for both coordination polymers were collected on a Bruker SMART APEX diffractometer which was equipped with graphite monochromated MoK $\alpha$  radiation ( $\lambda = 0.71073$  Å) by using an  $\omega$ -scan technique. The structures were solved by direct method (SHLEXS-2014) and refined using the full-matrix least-square procedure based on  $F^2$  (Shelxl-2014) [1]. All the hydrogen atoms were generated geometrically and refined isotropically using a riding model. All non-hydrogen atoms were refined with anisotropic displacement parameters. Crystallographic details and selected bond dimensions for **1-2** are listed in Tables S1-S3, respectively. CCDC numbers: 2049745-2049746.

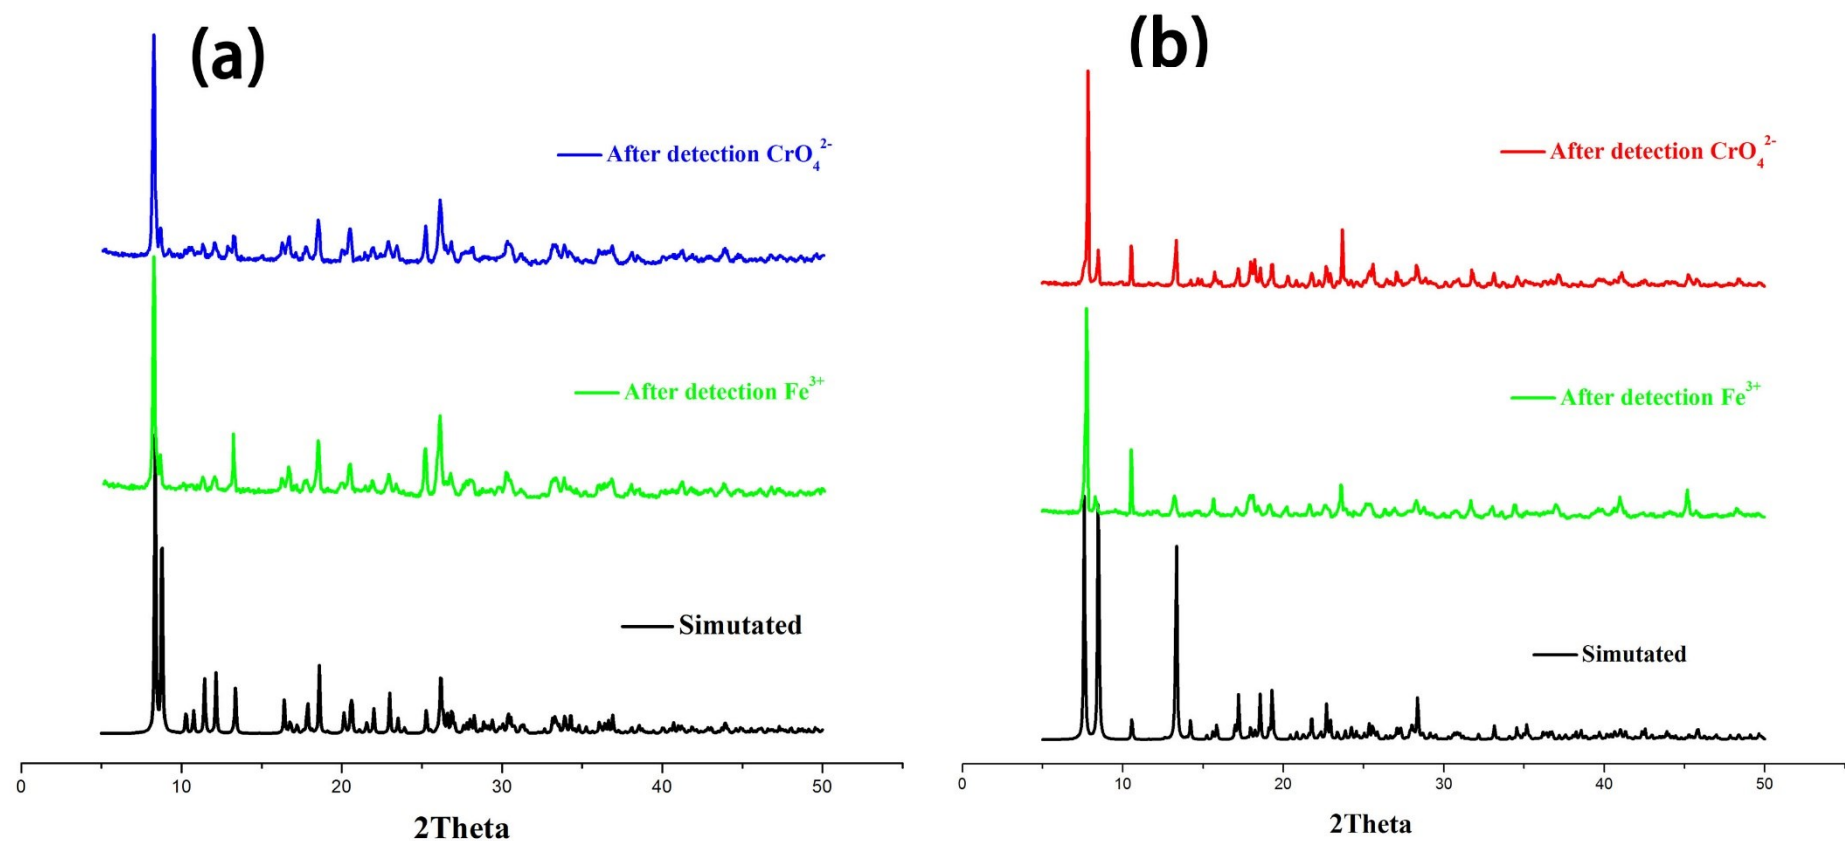

Fig. S1 (a) and (b) Powder XRD patterns of the simulated diagram from single crystal data (black), after detection  $\text{Fe}^{3+}$  (green) and after detection  $\text{CrO}_4^{2-}$  (blue and red) for **1-2**, respectively.

### FTIR spectroscopy

In the FTIR spectra it displayed strong and broad stretching vibrations at ca.  $3480\text{ cm}^{-1}$ , which can be assigned to the vibrations arising from the water molecules in **2** (Fig. S2). There is not any band around  $1700\text{ cm}^{-1}$  in **1** indicates that the  $\text{H}_4\text{L}$  ligands are completely deprotonated. The intense bands

observed at ca. 1650 and 1420  $\text{cm}^{-1}$  arises because of the asymmetric stretching and symmetric vibration of the carboxylate group of  $\text{H}_4\text{L}$  ligands, respectively. The value differences of  $\nu_{\text{as}(\text{COO})}-\nu_{\text{s}(\text{COO})}$  suggest that the  $\text{H}_4\text{L}$  ligands adopts bidentate and monodentate coordination modes, respectively. Additionally, the band observed at ca. 1520  $\text{cm}^{-1}$  can be ascribed to the  $\text{C}=\text{N}$  stretching vibrations of N-donor ligand.

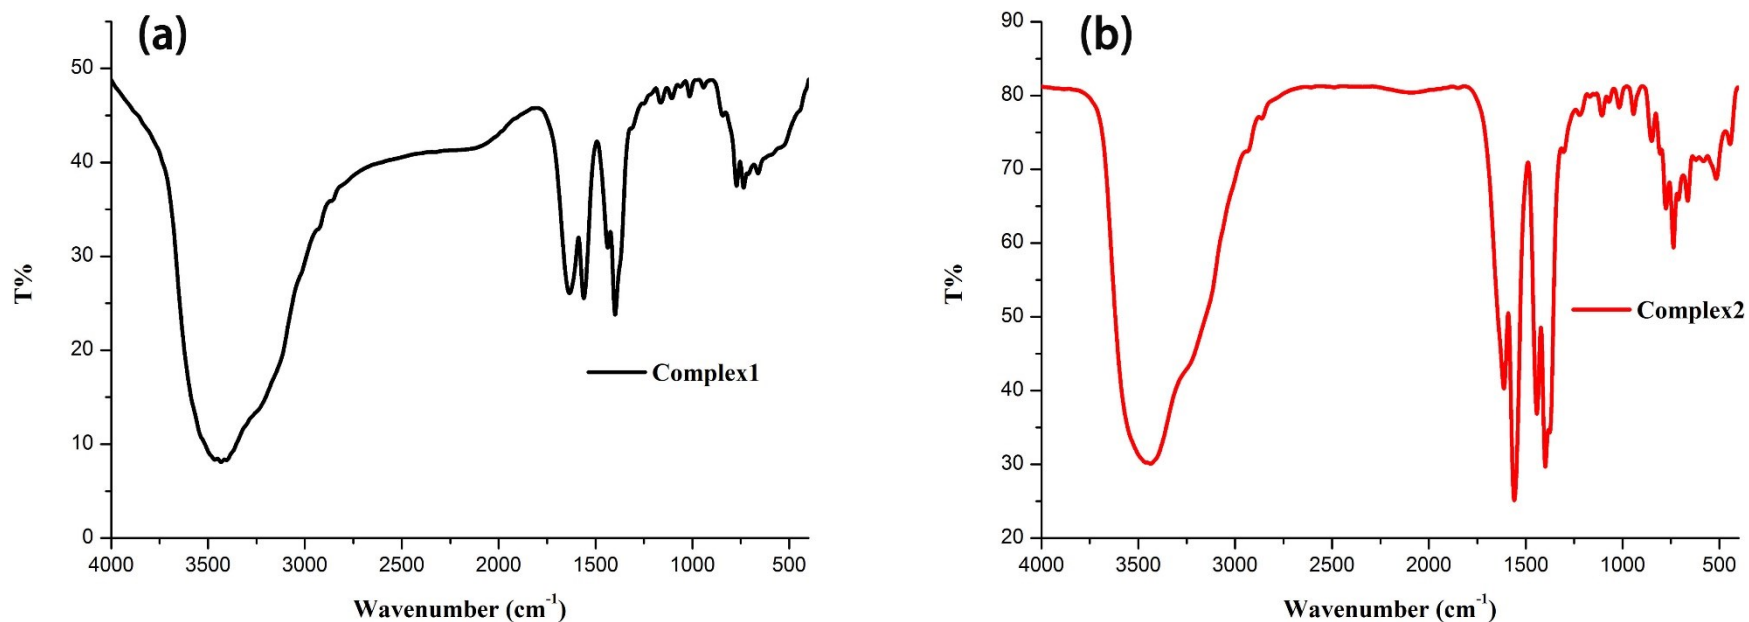

Fig. S2 view of the IR.

### Thermal analyses

To evaluate the thermal stability of complexes **1–2**, thermogravimetric (TG) analysis of complexes was performed under  $\text{N}_2$  conditions from room temperature to 800  $^\circ\text{C}$  with a heating rate of 5  $^\circ\text{C min}^{-1}$  (Fig. S3). Complex **2** displayed two weight loss stages. The first weight loss stage from 30 to 256  $^\circ\text{C}$  results from the complete decomposition of the coordinated  $\text{H}_2\text{O}$  molecules (obsd: 11.8%, calcd: 11.6%). The second weight loss stage from 406 to 550  $^\circ\text{C}$  results from the decomposition of the organic ligands. Complex **1** can be stabilized until 460  $^\circ\text{C}$ .

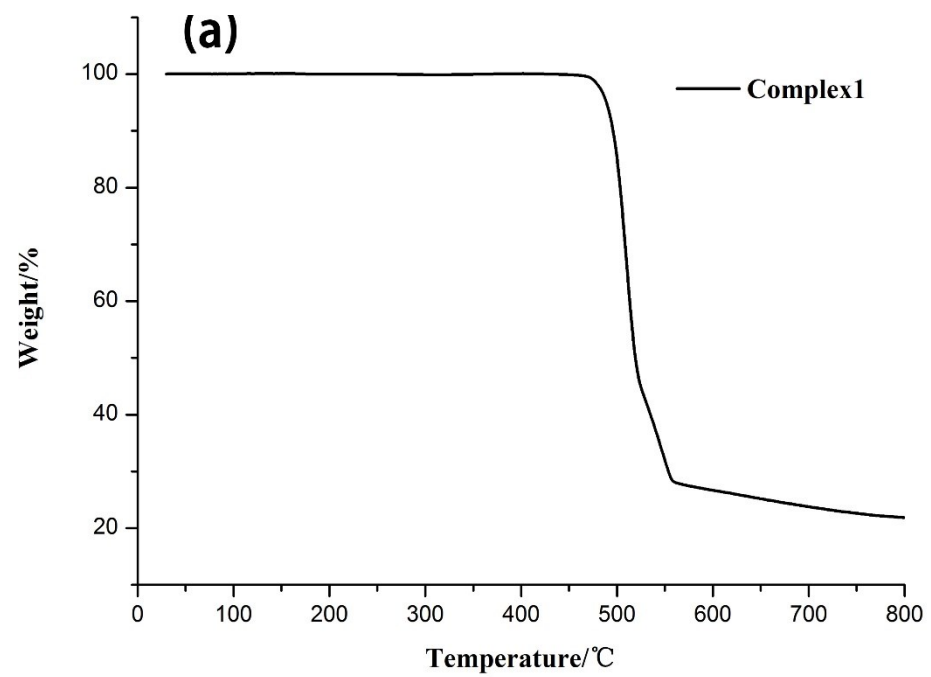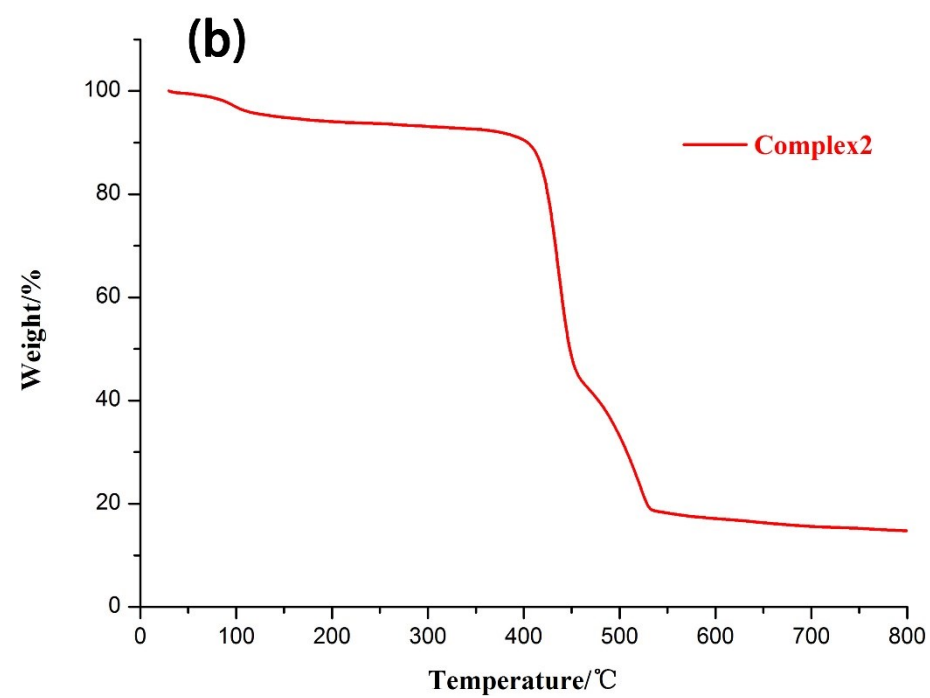

Fig. S3 view of the TGA.

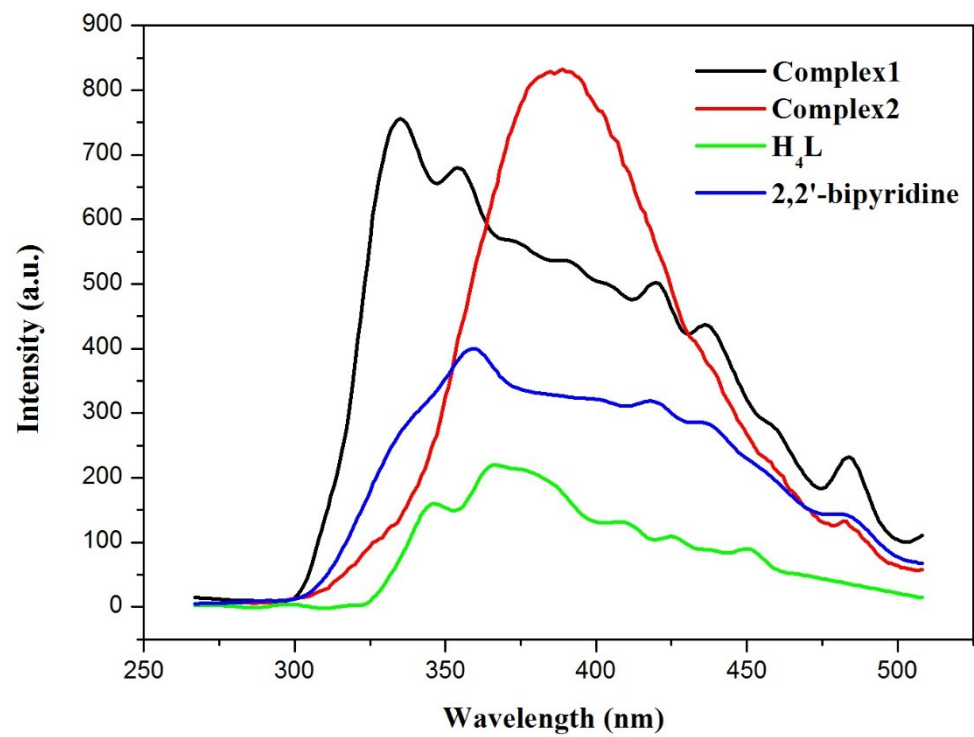

Fig. S4 Luminescence emission spectra of the CPs and the ligands ( $\lambda_{\text{exc}} = 260$  nm for **1**, 265 nm for **2**).

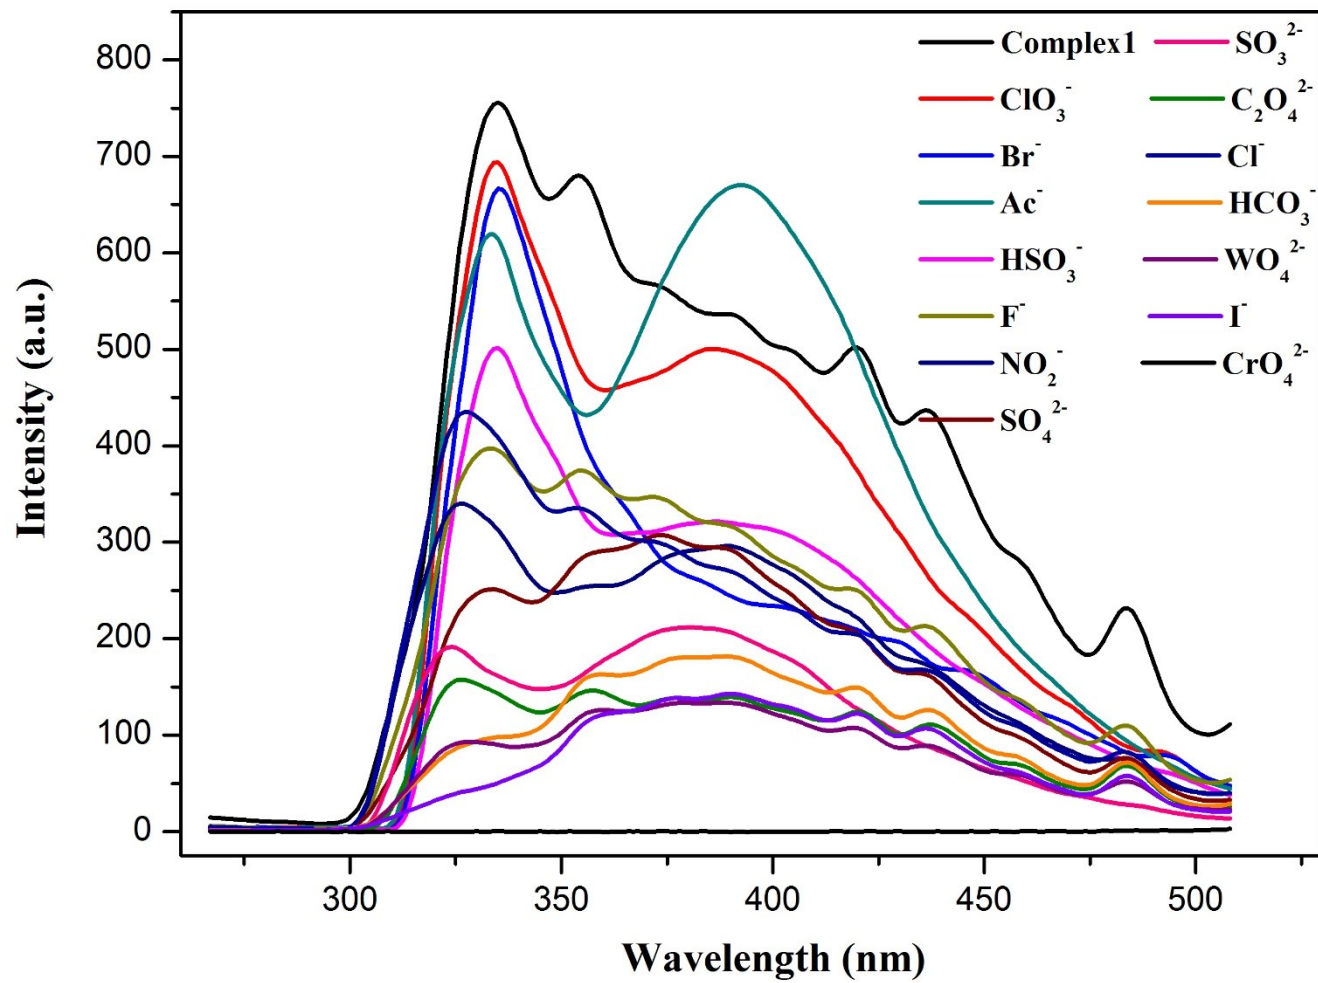

Fig. S5 Emission spectra of 1 with different anions.

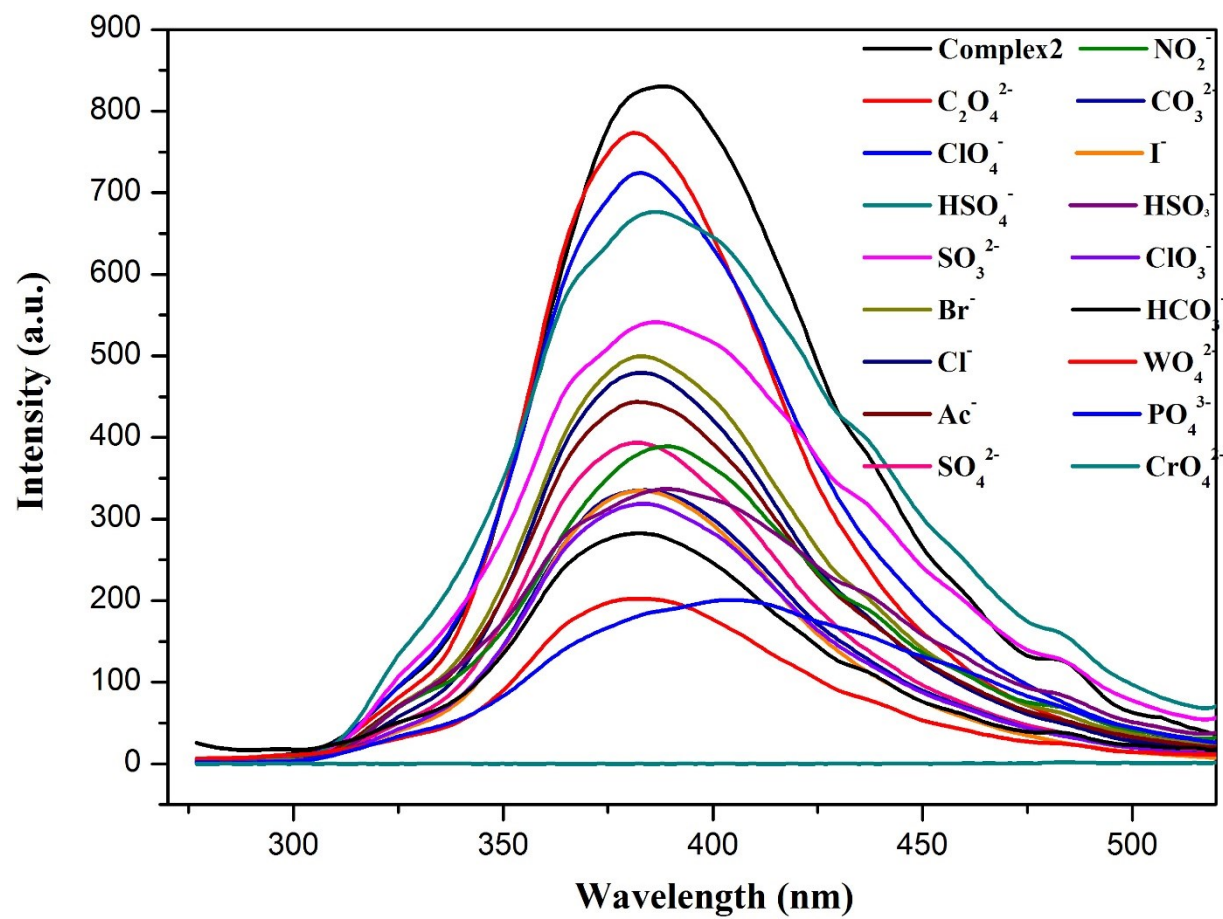

Fig. S6 Emission spectra of **2** with different anions.

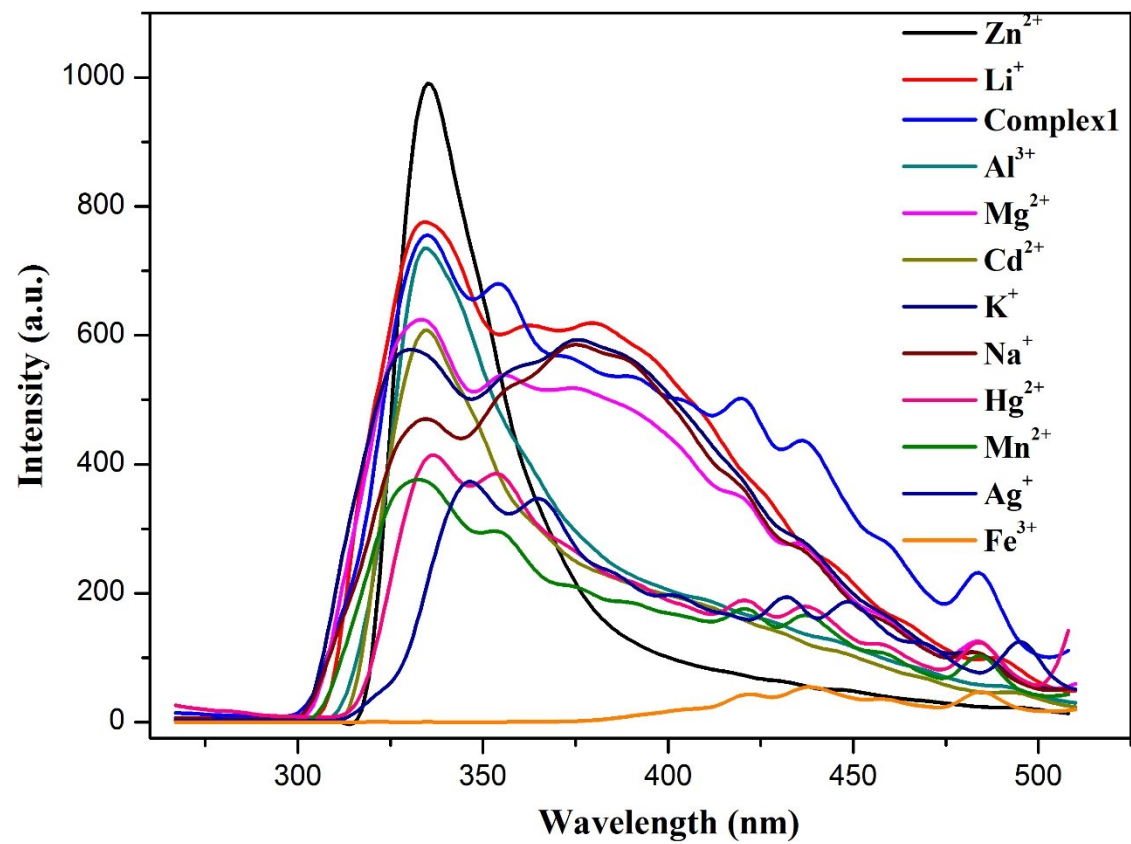

Fig. S7 Emission spectra of **1** with different metal ions.



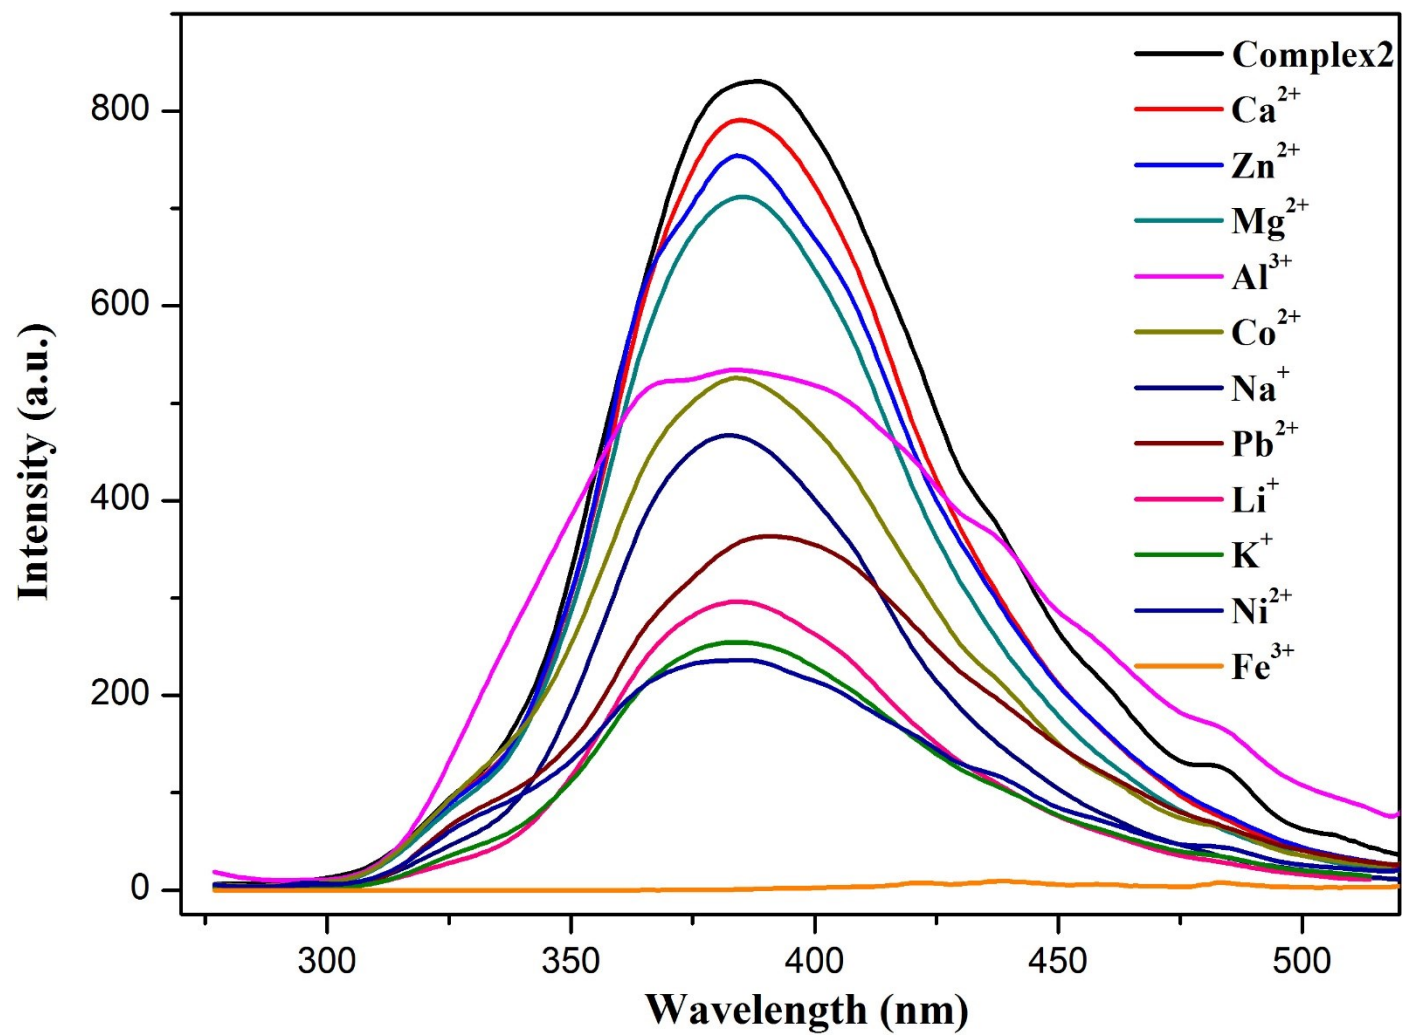

Fig. S8 Emission spectra of **2** with different metal ions.

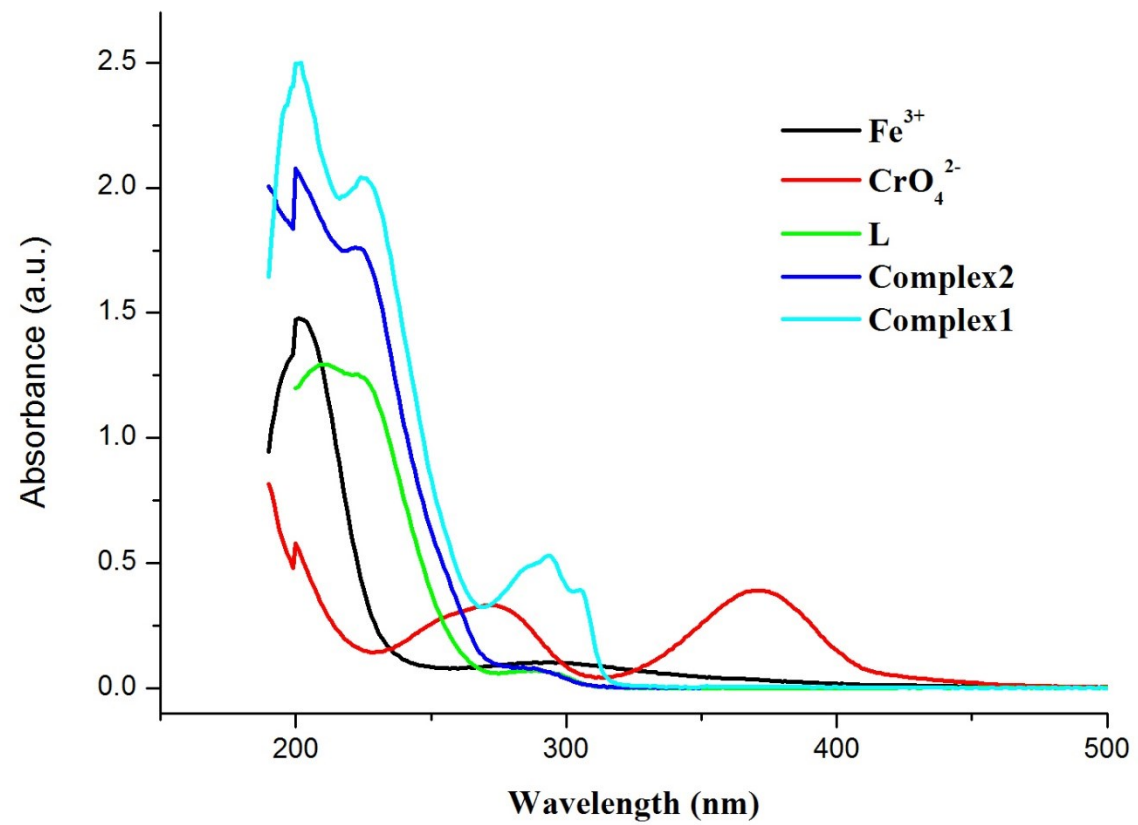

Fig. S9 the UV-vis spectra of complexes and analytes in this work.

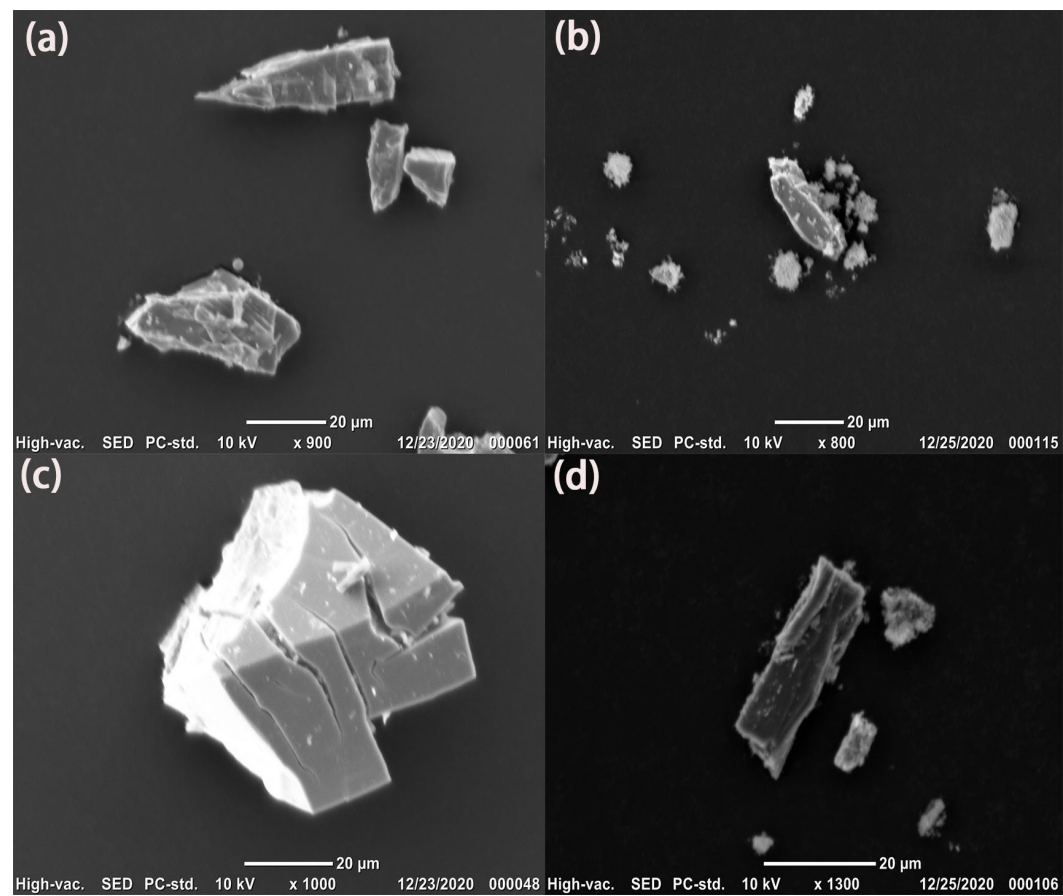

Fig. S10 The SEM images of **1** and **2**, (a) and (c) for the sample after sensing experiment, (b) and (d) for the original sample, respectively.

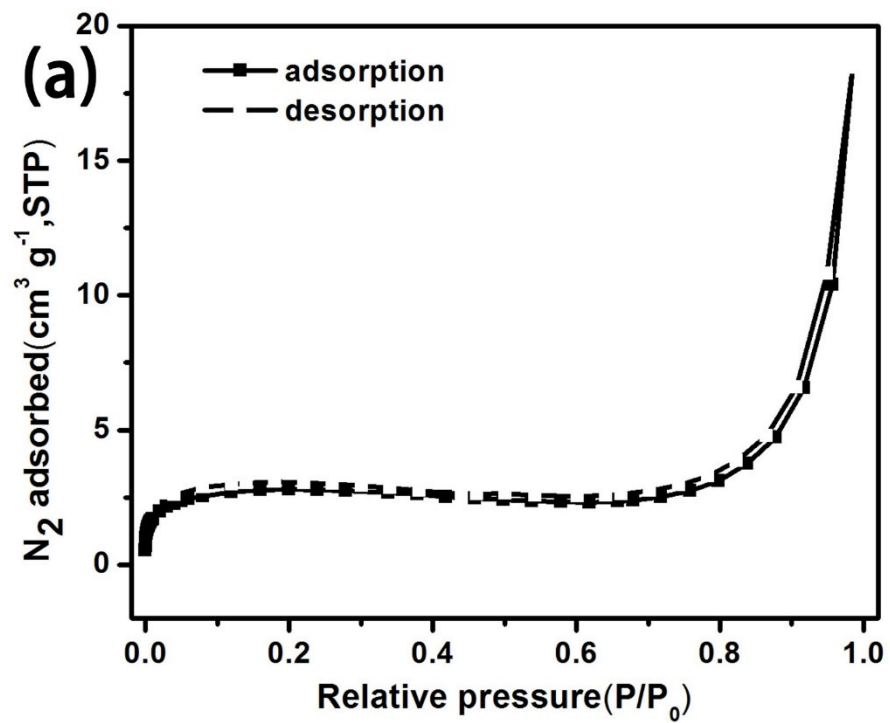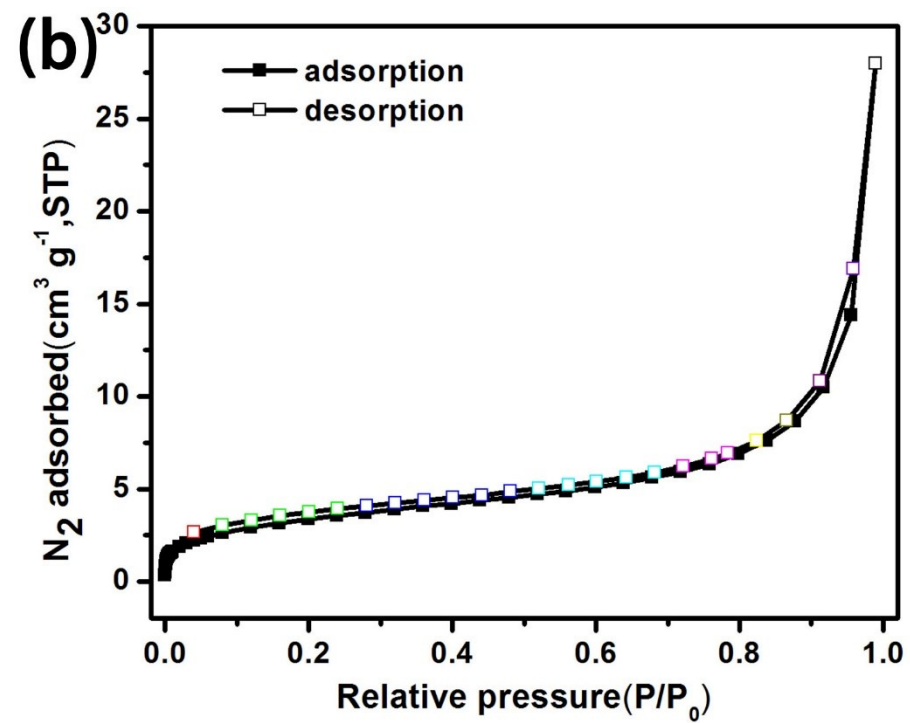

Fig. S11 Nitrogen adsorption-desorption isotherms of 1 and 2.

**Table S1.** Crystal data and structure refinement information for **1** and **2**

| Parameter                                 | <b>1</b>                                                                      | <b>2</b>                                                        |
|-------------------------------------------|-------------------------------------------------------------------------------|-----------------------------------------------------------------|
| Formula                                   | C <sub>26</sub> H <sub>14</sub> Cd <sub>2</sub> N <sub>2</sub> O <sub>8</sub> | C <sub>16</sub> H <sub>14</sub> Cd <sub>2</sub> O <sub>12</sub> |
| Formula weight                            | 707.19                                                                        | 623.07                                                          |
| Crystal system                            | Triclinic                                                                     | Monoclinic                                                      |
| Space group                               | <i>P</i> -1                                                                   | <i>P</i> 2 <sub>1</sub> / <i>c</i>                              |
| Crystal color                             | yellow                                                                        | yellow                                                          |
| <i>a</i> , [Å]                            | 10.1590(8)                                                                    | 7.60650(10)                                                     |
| <i>b</i> , [Å]                            | 11.0042(6)                                                                    | 13.9939(3)                                                      |
| <i>c</i> , [Å]                            | 11.2516(10)                                                                   | 20.8616(4)                                                      |
| $\alpha$ , [°]                            | 74.652(6)                                                                     | 90                                                              |
| $\beta$ , [°]                             | 66.351(8)                                                                     | 91.090(2)                                                       |
| $\gamma$ , [°]                            | 79.654(5)                                                                     | 90                                                              |
| <i>V</i> , Å <sup>3</sup>                 | 1107.27(16)                                                                   | 2220.20(7)                                                      |
| <i>Z</i>                                  | 2                                                                             | 4                                                               |
| $\rho_{\text{calcd}}$ , g/cm <sup>3</sup> | 2.121                                                                         | 1.864                                                           |
| $\mu$ , mm <sup>-1</sup>                  | 15.918                                                                        | 15.872                                                          |
| <i>F</i> (000)                            | 688                                                                           | 1208                                                            |
| $\theta$ Range, deg                       | 4.1690- 71.0160                                                               | 3.804- 71.281                                                   |
| Reflection collected                      | 7126/ 3965                                                                    | 14364/7239                                                      |

|                               |                |                |
|-------------------------------|----------------|----------------|
| Goodness-of-fit on $F^2$      | 1.070          | 1.068          |
| $R_1, wR_2(I > 2\sigma(I))^*$ | 0.0456, 0.1148 | 0.0307, 0.0787 |
| $R_1, wR_2$ (all data)**      | 0.0545, 0.1201 | 0.0370, 0.0811 |

$$* R = \sum(F_o - F_c) / \sum(F_o), \quad ** wR_2 = \{\sum[w(F_o^2 - F_c^2)^2] / \sum(F_o^2)^2\}^{1/2}.$$

Table S2. Selected bond distances (Å) and angles (°) of **1**

|                   |            |                   |            |
|-------------------|------------|-------------------|------------|
| Cd(1)-O(1)        | 2.152(4)   | Cd(1)-O(3A)       | 2.178(4)   |
| Cd(1)-O(6B)       | 2.216(4)   | Cd(1)-O(7B)       | 2.352(4)   |
| Cd(1)-O(7C)       | 2.308(4)   | Cd(2)-O(2D)       | 2.339(4)   |
| Cd(2)-O(4)        | 2.297(5)   | Cd(2)-O(5E)       | 2.326(4)   |
| Cd(2)-O(8F)       | 2.322(4)   | Cd(2)-N(1)        | 2.394(5)   |
| Cd(2)-N(2)        | 2.347(5)   |                   |            |
| O(1)-Cd(1)-O(3A)  | 90.69(18)  | O(1)-Cd(1)-O(6B)  | 113.44(19) |
| O(6B)-Cd(1)-O(3A) | 108.73(17) | O(7B)-Cd(1)-O(3A) | 160.26(17) |
| O(7B)-Cd(1)-O(7C) | 74.07(16)  | O(6B)-Cd(1)-O(7C) | 76.46(15)  |
| O(2D)-Cd(2)-N(1)  | 104.70(17) | O(2D)-Cd(2)-N(2)  | 83.53(17)  |
| O(2D)-Cd(2)-O(4)  | 161.14(17) | O(5E)-Cd(2)-O(4)  | 102.96(17) |
| O(8F)-Cd(2)-O(4)  | 80.98(17)  | N(2)-Cd(2)-O(4)   | 114.94(17) |

Symmetry codes: A: -x, 2-y, 2-z; B: -1+x, y, 1+z; C: 1-x, 2-y, 2-z; D: x, y, -1+z; E: 1-x, 2-y, 1-z; F: -1+x, y, z.

Table S3. Selected bond distances (Å) and angles (°) of **2**

|             |          |             |          |
|-------------|----------|-------------|----------|
| Cd(1)-O(1)  | 2.251(3) | Cd(1)-O(10) | 2.303(4) |
| Cd(1)-O(3A) | 2.319(3) | Cd(1)-O(4A) | 2.384(3) |
| Cd(1)-O(7B) | 2.459(3) | Cd(1)-O(8B) | 2.396(3) |
| Cd(1)-O(9)  | 2.336(5) | Cd(2)-O(2)  | 2.230(3) |
| Cd(2)-O(5C) | 2.443(3) | Cd(2)-O(6C) | 2.323(3) |
| Cd(2)-O(8B) | 2.237(3) | Cd(2)-O(11) | 2.335(4) |
| Cd(2)-O(12) | 2.268(4) |             |          |

|                  |            |                  |            |
|------------------|------------|------------------|------------|
| O(1)-Cd(1)-O(3A) | 90.22(12)  | O(1)-Cd(1)-O(4A) | 145.29(12) |
| O(1)-Cd(1)-O(7B) | 132.13(12) | O(1)-Cd(1)-O(8B) | 80.18(11)  |
| O(1)-Cd(1)-O(9)  | 90.5(2)    | O(1)-Cd(1)-O(10) | 90.81(19)  |
| O(2)-Cd(2)-O(5C) | 86.60(11)  | O(2)-Cd(2)-O(6C) | 135.19(12) |
| O(2)-Cd(2)-O(8B) | 119.63(12) | O(2)-Cd(2)-O(11) | 87.45(13)  |
| O(2)-Cd(2)-O(12) | 91.89(16)  | O(6)-Cd(2)-O(5)  | 54.76(10)  |

Symmetry codes:A: -x, 1-y, 1-z; B: -1+x, 0.5-y, -0.5+z; C: x, 0.5-y, -0.5+z.

**Table S4** Luminescent sensors for CrO<sub>4</sub><sup>2-</sup> sensing based on the luminescent MOFs.

| MOF                                                                                                                                         | Solvent | Quenching constant, $K_{sv}$          | Working range | Ref       |
|---------------------------------------------------------------------------------------------------------------------------------------------|---------|---------------------------------------|---------------|-----------|
| [Zn(L)(H <sub>2</sub> O)]·H <sub>2</sub> O                                                                                                  | Water   | 1.02x10 <sup>4</sup> M <sup>-1</sup>  | 0-8 μM        |           |
| [Zn <sub>2</sub> (TPOM)(NH <sub>2</sub> -bdc) <sub>2</sub> ]·4H <sub>2</sub> O                                                              | DMF     | 4.45x10 <sup>3</sup> M <sup>-1</sup>  | 0-100 μM      |           |
| [Zn(IPA)(L)]                                                                                                                                | Water   | 1.00x10 <sup>3</sup> M <sup>-1</sup>  | -             |           |
| [Cd(IPA)(L)]                                                                                                                                | Water   | 1.30x10 <sup>3</sup> M <sup>-1</sup>  | -             |           |
| [Eu <sub>2</sub> (tpbpc) <sub>4</sub> (CO <sub>3</sub> )(H <sub>2</sub> O) <sub>4</sub> ]·DMF                                               | Water   | 4.83x10 <sup>4</sup> M <sup>-1</sup>  | 0-0.3 mM      |           |
| [Eu <sub>7</sub> (mtb) <sub>5</sub> (H <sub>2</sub> O) <sub>16</sub> ](NO <sub>3</sub> )(DMA) <sub>8</sub> (H <sub>2</sub> O) <sub>18</sub> | Water   | 3.30x10 <sup>4</sup> M <sup>-1</sup>  | 6 nM-2 mM     |           |
| [Zn(btz)]                                                                                                                                   | Water   | 3.19x10 <sup>3</sup> M <sup>-1</sup>  |               |           |
| [Zn <sub>2</sub> (ttz)(H <sub>2</sub> O)]                                                                                                   | Water   | 2.35x10 <sup>3</sup> M <sup>-1</sup>  |               |           |
| [Zn <sub>3</sub> (bpanth)(oba) <sub>3</sub> ]·2DMF                                                                                          | Water   | 1.24x10 <sup>5</sup> M <sup>-1</sup>  | 0-3 μM        |           |
| [Y(BTC)(H <sub>2</sub> O) <sub>6</sub> ] <sub>n</sub> :0.1Eu                                                                                | Water   | 1.18x10 <sup>3</sup> M <sup>-1</sup>  | 0-300 μM      |           |
| [Zn(NH <sub>2</sub> -bdc)(4,4'-bpy)]                                                                                                        | Water   | 4.56x10 <sup>3</sup> M <sup>-1</sup>  | 0-50 μM       |           |
| <b>1</b>                                                                                                                                    | Water   | 4.51x10 <sup>5</sup> M <sup>-1</sup>  | 0-10 μM       | This work |
| <b>2</b>                                                                                                                                    | Water   | 3.61 x10 <sup>5</sup> M <sup>-1</sup> | 0-10 uM       | This work |

## References

1. X.-Y. Guo, F. Zhao, J.-J. Liu, Z.-L. Liu and Y.-Q. Wang, An ultrastable zinc(II)-organic framework as a recyclable multi-responsive luminescent sensor for Cr(III), Cr(VI) and 4-nitrophenol in the aqueous phase with high selectivity and sensitivity, *J. Mater. Chem. A*, 2017, 5, 20035–20043.
2. R. Lv, J. Wang, Y. Zhang, H. Li, L. Yang, S. Liao, W. Gu and X. Liu, An amino-decorated dual-functional metal-organic framework for highly selective sensing of Cr(III) and Cr(VI) ions and detection of nitroaromatic explosives, *J. Mater. Chem. A*, 2016, 4, 15494–15500.
3. B. Parmar, Y. Rachuri, K. K. Bisht, R. Laiya and E. Suresh, Mechanochemical and Conventional Synthesis of Zn(II)/Cd(II) Luminescent Coordination Polymers: Dual Sensing Probe for Selective Detection of Chromate Anions and TNP in Aqueous Phase, *Inorg. Chem.*, 2017, 56, 2627–2638.
4. J. Liu, G. Ji, J. Xiao and Z. Liu, Ultrastable 1D Europium Complex for Simultaneous and Quantitative Sensing of Cr(III) and Cr(VI) Ions in Aqueous Solution with High Selectivity and Sensitivity, *Inorg. Chem.*, 2017, 56, 4197–4205.
5. W. Liu, Y. Wang, Z. Bai, Y. Li, Y. Wang, L. Chen, L. Xu, J. Diwu, Z. Chai and S. Wang, Hydrolytically Stable Luminescent Cationic Metal Organic Framework for Highly Sensitive and Selective Sensing of Chromate Anions in Natural Water Systems, *ACS Appl. Mater. Interfaces.*, 2017, 9, 16448–16457.
6. H. R. Fu, Y. Zhao, Z. Zhou, X. G. Yang and L. F. Ma, Neutral ligand TIPA-based two 2D metal-organic frameworks: ultrahigh selectivity of C<sub>2</sub>H<sub>2</sub>/CH<sub>4</sub> and efficient sensing and sorption of Cr(VI), *Dalton Trans.*, 2018, 47, 3725–3732.
7. G. P. Li, G. Liu, Y. Z. Li, L. Hou, Y. Y. Wang and Z. Zhu, Uncommon Pyrazoyl-Carboxyl Bifunctional Ligand-Based Microporous Lanthanide Systems: Sorption and Luminescent Sensing Properties, *Inorg. Chem.*, 2016, 55, 3952–3959.
8. C. S. Cao, H. C. Hu, H. Xu, W. Z. Qiao and B. Zhao, Two solvent-stable MOFs as a recyclable luminescent probe for detecting dichromate or chromate anions *Cryst Eng. Comm.*, 2016, 18, 4445–4451.
9. L. Wei, H. Xin, X. Cong, C. Chunyang, Y. Lizi, D. Wei, C. Wanmin, Y. Huan and L. Weisheng, A Multi-responsive Regenerable Europium-Organic Framework Luminescent Sensor for Fe<sup>3+</sup>, Cr<sup>VI</sup> Anions, and Picric Acid, *Chem. Eur. J.*, 2016, 22, 18769–18776.
10. Y. Zhao-Quan, L. Guang-Yu, X. Jian, H. Tong-Liang and B. Xian-He, A Water-Stable Luminescent Zn<sup>II</sup> Metal-Organic Framework as Chemosensor for High-Efficiency Detection of Cr<sup>VI</sup>-Anions (Cr<sub>2</sub>O<sub>7</sub><sup>2-</sup> and CrO<sub>4</sub><sup>2-</sup>) in Aqueous Solution, *Chem. Eur. J.*, 2018, 24, 3192–3198.
11. T.W. Duan, B. Yan, H. Weng, Europium Activated Yttrium Hybrid Microporous System for Luminescent Sensing Toxic Anion of Cr (VI) Species, *Microporous Mesoporous Mater.*, 2015, 217, 196-202.



**Table S5.** A comparison of the Stern-Volmer constant ( $K_{sv}$ ), detection limit used for  $Fe^{3+}$  detection for selected MOFs.

| No. | Compounds                                             | $K_{sv}$ ( $M^{-1}$ ) | detection limit         | Ref       |
|-----|-------------------------------------------------------|-----------------------|-------------------------|-----------|
| 1   | $[Zr_6O_6(OH)_2(CF_3COO)_2(C_{11}H_5NO_4)_4(H_2O)_4]$ | $2.25 \times 10^7$    | $1.7 \times 10^{-9} M$  | 1         |
| 2   | EuL3                                                  | $4.1 \times 10^3$     | $10^{-4} M$             | 2         |
| 3   | $Eu^{3+}@MIL-124$                                     | $3.87 \times 10^4$    | $0.28 \times 10^{-6} M$ | 3         |
| 4   | $Tb^{3+}@Cd-MOF$                                      | $1.108 \times 10^5$   | 0.010 mM                | 4         |
| 5   | $[Zr_6O_4(OH)_4(2,7-CDC)_6]$                          | $5.5 \times 10^3$     | $9.10 \times 10^{-7} M$ | 5         |
| 6   | <b>1</b>                                              | $2.99 \times 10^5$    | $2.47 \times 10^{-8} M$ | This work |
| 7   | <b>2</b>                                              | $1.23 \times 10^6$    | $1.35 \times 10^{-9} M$ | This work |

**References:**

1. C. Gogoi, S. Biswas, *Dalton Trans.* 2018, 47, 14696
2. M. Zheng, H. Tan, Z. Xie, L. Zhang, X. Jing and Z. Sun, *ACS Appl. Mater. Interfaces*, 2013, 5, 1078–1083.
3. X.-Y. Xu and B. Yan, *ACS Appl. Mater. Interfaces*, 2014, 7, 721-729.
4. H. Weng and B. Yan, *Sens. Actuator B-Chem.*, 2016, 228, 702–708.
5. A. Das and S. Biswas, *Sens. Actuator B-Chem*, 2017, 250, 121-131.
